# Supplementary material
Source: PubMed Central journal article supplement (PMC4187759)

# Minimum Spanning tree of the 435 STs in the *S. suis* MLST database.

Field isolates were grouped into clonal complexes (clonal families), defined as groups of profiles differing by no more than one gene from at least one other profile in the group. STs included in this study were marked red. Clonal complexes were marked with red circle. Clonal complexes including STs in this study were marked with red circle and numbers (from 1 to 15). The distance between STs are denoted by lines of different styles: thick solid black lines = 1 locus difference; thin solid black lines = 2 locus difference; dashed black line = 3 locus difference; dark grey lines = 4 locus difference; and light grey lines > 4 locus difference. (The figure is best viewed when zoomed in).

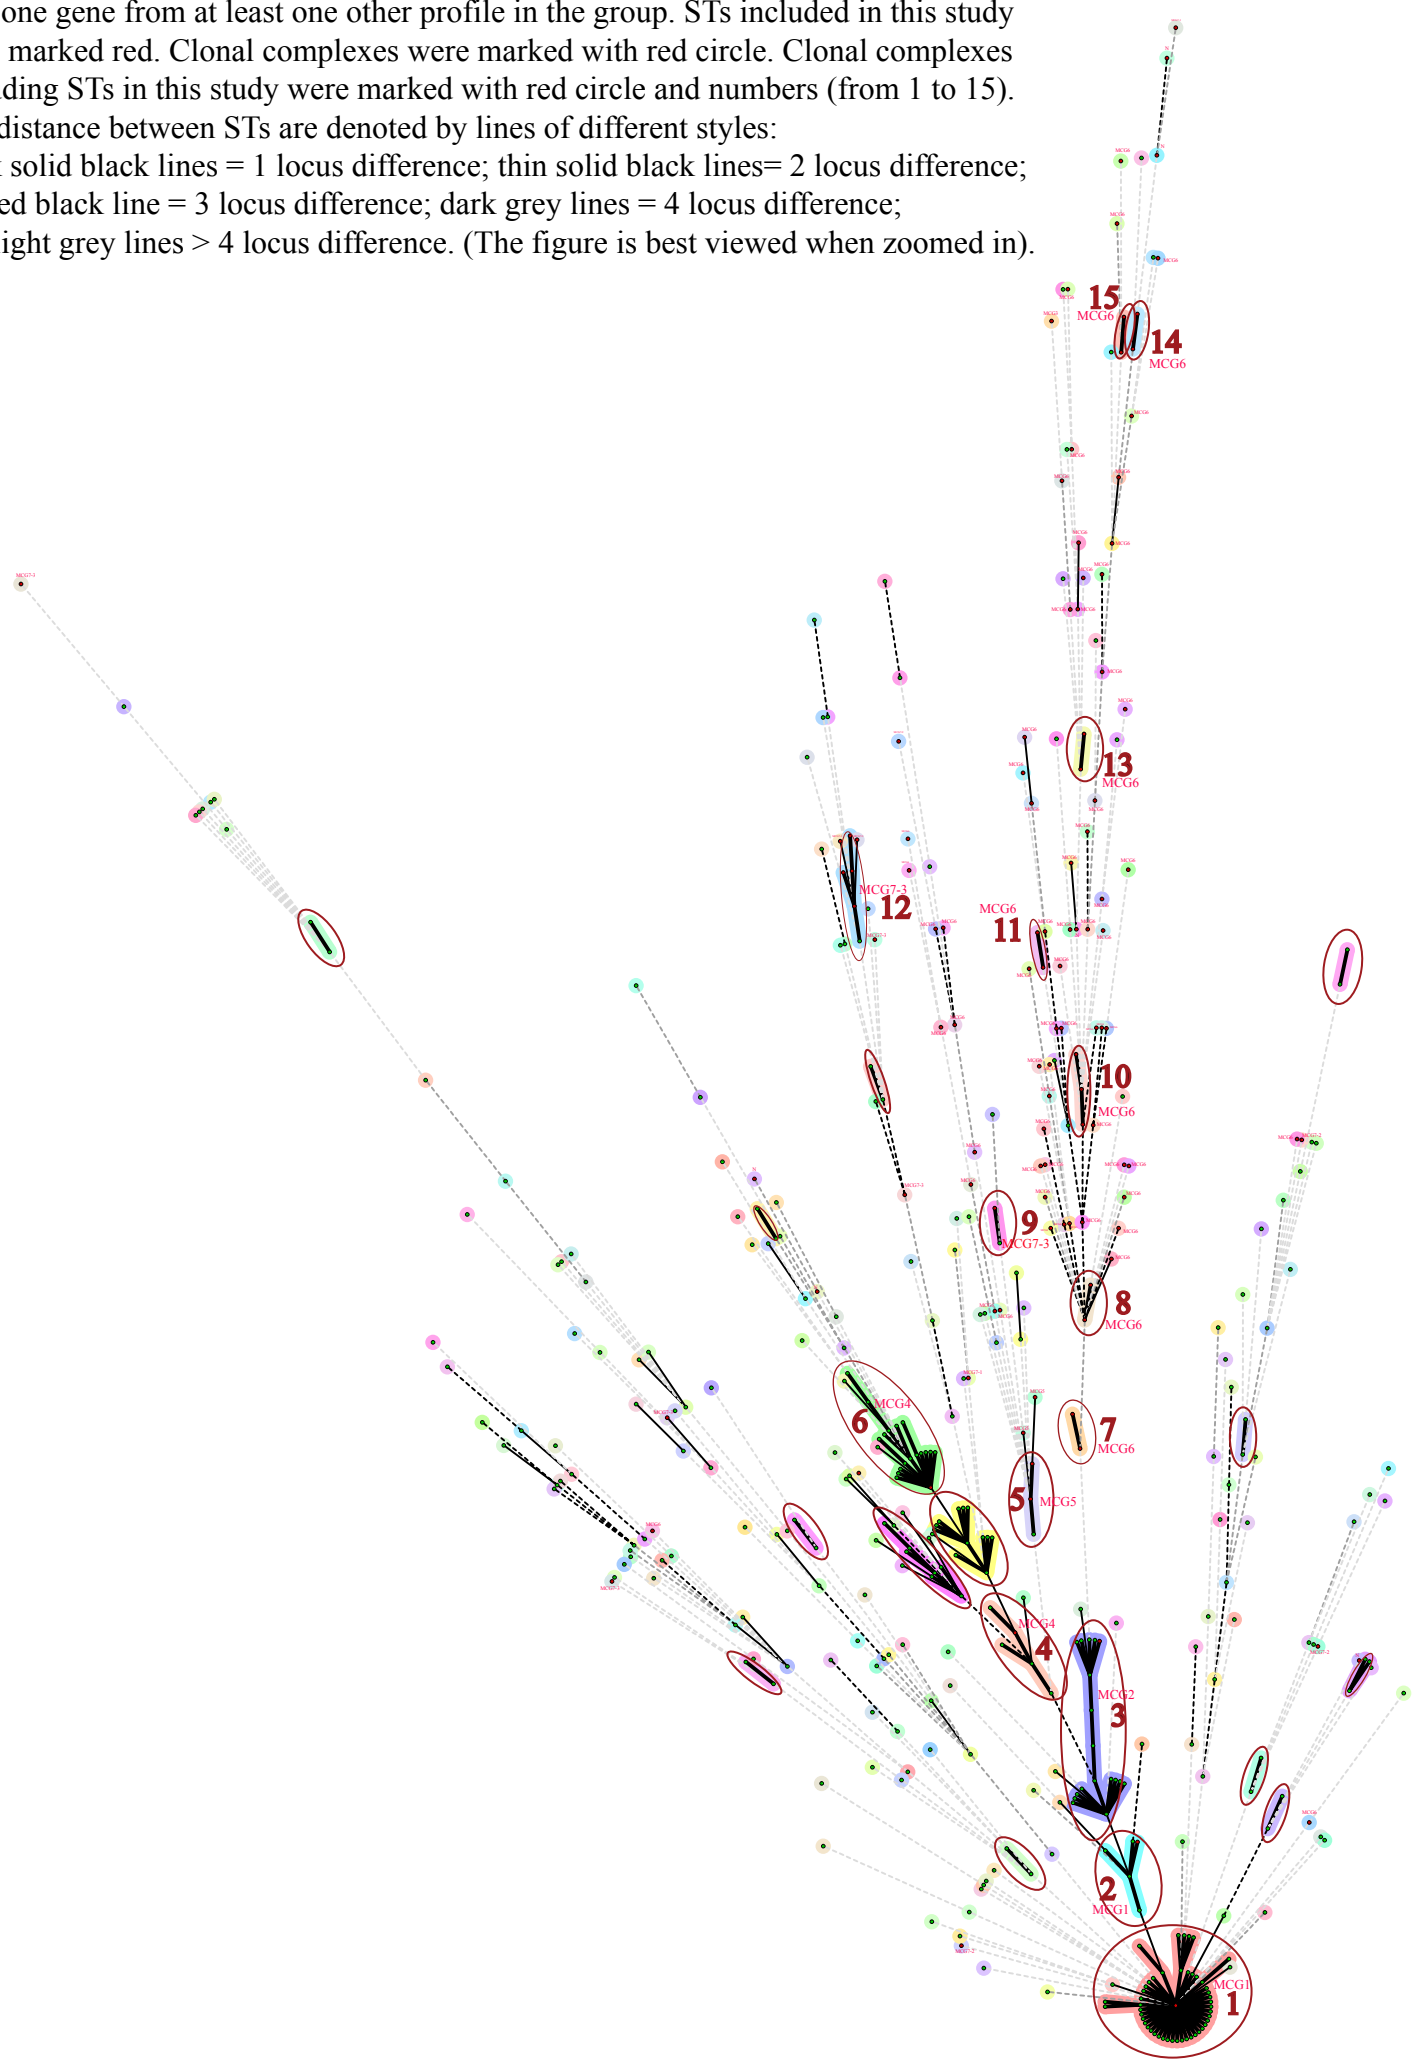

Supplement: JCM.00536-14_zjm999093730so1.pdf [file JCM.00536-14_zjm999093730so1.pdf]
