# Supplementary material
Source: PubMed Central journal article supplement (PMC4187759)
Supplement: JCM.00536-14_zjm999093730so2.pdf [file JCM.00536-14_zjm999093730so2.pdf]

Supplemental table 1: The information of the tested isolates.

| Isolate | CDS0777 |        | CDS0114 | CDS0088 |       |       | CDS1981 |         | CDS776 | CDS530 | MCG group | <i>sly</i> | <i>ef</i> | <i>mrp</i> | CDS 2157  | Serotype | MLST | clonal complex |
|---------|---------|--------|---------|---------|-------|-------|---------|---------|--------|--------|-----------|------------|-----------|------------|-----------|----------|------|----------------|
|         | 824818  | 825000 | 107453  | 81999   | 81404 | 81419 | 2028744 | 2028696 | 822644 | 572576 |           |            |           |            |           |          |      |                |
| YS1     | T       | G      | A       | G       | A     | T     | A       | G       | C      | G      | 1         | +          | +         | -          | 2         | ST1      | 1    |                |
| YS2     | T       | G      | G       | G       | A     | T     | G       | G       | C      | G      | 4         |            |           | NA1        | 2         | ST28     | 6    |                |
| YS3     | T       | G      | A       | G       | A     | T     | G       | G       | C      | G      | N *       |            |           | NA1        | 11        | ST304    |      |                |
| YS4     | T       | G      | G       | G       | A     | T     | G       | G       | C      | G      | 4         |            |           | NA1        | 1/2       | ST28     | 6    |                |
| YS5     | T       | G      | A       | G       | A     | T     | A       | G       | C      | G      | 1         | +          | +         | EU         | -         | 1/2      | ST1  | 1              |
| YS6     | T       | G      | A       | G       | A     | T     | A       | G       | C      | G      | 1         | +          | +         | EU         | -         | 2        | ST1  | 1              |
| YS7     | T       | G      | A       | T       | A     | T     | G       | G       | C      | G      | 6         |            |           |            | untypable | ST305    |      |                |
| YS8     | T       | G      | A       | T       | A     | T     | G       | G       | C      | G      | 6         |            |           |            | untypable | ST305    |      |                |
| YS9     | T       | G      | A       | G       | A     | T     | A       | G       | C      | G      | 1         | +          | +         | EU         | -         | 14       | ST1  | 1              |
| YS10    | T       | A      | A       | G       | A     | T     | G       | G       | C      | G      | 5         |            |           | NA1        | 12        | ST306    |      |                |
| YS11    | C       | G      | A       | G       | A     | T     | G       | G       | C      | G      | 2         |            |           | NA2        | 8         | ST308    | 3    |                |
| YS12    | T       | G      | A       | G       | A     | T     | A       | G       | C      | G      | 1         | +          | +         | NA2        | 7         | ST17     | 2    |                |
| YS13    | T       | G      | A       | G       | A     | T     | G       | G       | C      | A      | 7-3       |            |           |            | 9         | ST307    | 9    |                |
| YS14    | C       | G      | A       | G       | A     | T     | G       | G       | C      | G      | 2         |            |           | NA2        | 8         | ST308    | 3    |                |
| YS15    | T       | G      | A       | G       | A     | T     | G       | G       | C      | A      | 7-3       |            |           |            | 10        | ST311    |      |                |
| YS16    | T       | G      | A       | G       | A     | G     | G       | G       | C      | G      | 7-2       |            |           |            | 31        | ST309    |      |                |
| YS17    | T       | G      | A       | G       | A     | T     | G       | G       | C      | A      | 7-3       |            |           |            | 31        | ST327    |      |                |
| YS18    | T       | G      | G       | G       | A     | T     | G       | G       | C      | G      | 4         |            |           | NA1        | 2         | ST28     | 6    |                |
| YS19    | T       | G      | G       | G       | A     | T     | G       | G       | C      | G      | 4         |            |           | NA1        | 2         | ST28     | 6    |                |
| YS20    | T       | G      | G       | G       | A     | T     | G       | G       | C      | G      | 4         |            |           | NA1        | 2         | ST28     | 6    |                |

|      |   |   |   |   |   |   |   |   |   |   |     |     |           |           |    |
|------|---|---|---|---|---|---|---|---|---|---|-----|-----|-----------|-----------|----|
| YS21 | T | G | A | T | A | T | G | G | C | G | 6   |     | untypable | ST310     |    |
| YS22 | T | G | A | T | A | T | G | G | C | G | 6   |     | untypable | ST310     |    |
| YS23 | T | G | A | T | A | T | G | G | C | G | 6   |     | untypable | ST328     |    |
| YS24 | T | G | A | G | A | T | G | G | C | A | 7-3 |     | 10        | ST311     |    |
| YS25 | T | G | A | G | A | T | G | G | C | A | 7-3 |     | 10        | ST311     |    |
| YS26 | T | G | G | G | A | T | G | G | C | G | 4   | NA1 | 1/2       | ST28      | 6  |
| YS27 | T | G | A | T | A | T | G | G | C | G | 6   |     | untypable | ST312     |    |
| YS28 | T | G | A | T | A | T | G | G | C | G | 6   |     | 21        | ST338     |    |
| YS29 | T | G | G | G | A | T | G | G | C | G | 4   | NA1 | 2         | ST28      | 6  |
| YS30 | T | G | A | G | G | T | G | G | C | G | 7-1 | NA1 | 12        | ST316     |    |
| YS31 | T | A | A | G | A | T | G | G | C | G | 5   | NA1 | 12        | ST313     | 5  |
| YS32 | T | G | A | G | A | T | G | G | C | G | N * |     | 11        | untypable |    |
| YS33 | T | G | A | G | A | T | G | G | C | A | 7-3 |     | untypable | ST423     | 12 |
| YS34 | T | G | A | G | A | T | G | G | C | A | 7-3 |     | untypable | ST314     |    |
| YS35 | T | G | A | G | A | G | G | G | C | G | 7-2 |     | untypable | ST315     |    |
| YS36 | T | A | A | G | A | T | G | G | C | G | 5   | NA1 | 12        | ST313     | 5  |
| YS37 | T | G | A | G | A | T | G | G | C | A | 7-3 |     | untypable | ST339     | 12 |
| YS38 | T | G | A | G | A | G | G | G | C | G | 7-2 |     | untypable | ST315     |    |
| YS39 | T | G | A | G | G | T | G | G | C | G | 7-1 | NA1 | 12        | ST316     |    |
| YS40 | T | G | A | G | A | T | G | G | C | A | 7-3 |     | 16        | ST424     |    |
| YS41 | T | G | A | G | A | T | G | G | C | G | N * |     | untypable | ST340     |    |
| YS42 | T | G | A | T | A | T | G | G | C | G | 6   |     | untypable | ST341     |    |
| YS43 | T | G | A | G | A | T | G | G | C | A | 7-3 |     | untypable | ST317     |    |
| YS44 | T | A | A | G | A | T | G | G | C | G | 5   | NA1 | 11        | ST318     | 5  |
| YS45 | T | A | A | G | A | T | G | G | C | G | 5   | NA1 | 11        | ST318     | 5  |
| YS46 | T | G | A | T | A | T | G | G | C | G | 6   |     | untypable | untypable |    |

|      |   |   |   |   |   |   |   |   |   |   |     |     |           |           |    |
|------|---|---|---|---|---|---|---|---|---|---|-----|-----|-----------|-----------|----|
| YS47 | T | G | A | T | A | T | G | G | C | G | 6   |     | 29        | ST330     | 10 |
| YS48 | T | G | A | T | A | T | G | G | C | G | 6   |     | 29        | ST425     | 10 |
| YS49 | T | G | A | T | A | T | G | G | C | G | 6   |     | untypable | ST329     | 10 |
| YS50 | T | G | A | T | A | T | G | G | C | G | 6   |     | 29        | ST330     | 10 |
| YS51 | T | A | A | G | A | T | G | G | C | G | 5   | NA1 | 11        | ST318     | 5  |
| YS52 | T | G | A | G | A | T | G | G | T | G | 3   |     | 5         | ST342     |    |
| YS53 | T | A | A | G | A | T | G | G | C | G | 5   | NA1 | 11        | ST318     | 5  |
| YS54 | T | G | A | T | A | T | G | G | C | G | 6   |     | 29        | ST319     |    |
| YS55 | T | G | A | T | A | T | G | G | C | G | 6   |     | 29        | ST343     |    |
| YS56 | T | G | A | G | A | G | G | G | C | G | 7-2 |     | untypable | ST331     |    |
| YS57 | T | G | A | T | A | T | G | G | C | G | 6   |     | untypable | ST320     |    |
| YS58 | T | G | A | T | A | T | G | G | C | G | 6   |     | 29        | ST344     |    |
| YS59 | T | A | A | G | A | T | G | G | C | G | 5   | NA1 | 12        | ST313     | 5  |
| YS60 | T | G | A | T | A | T | G | G | C | G | 6   |     | 29        | untypable |    |
| YS61 | T | G | A | T | A | T | G | G | C | G | 6   |     | 29        | untypable |    |
| YS62 | T | G | A | G | A | T | G | G | C | G | N * |     | 11        | ST345     |    |
| YS63 | T | G | G | G | A | T | G | G | C | G | 4   | +   | 7         | ST32      | 4  |
| YS64 | T | G | A | G | A | T | G | G | C | G | N * | NA1 | 11        | ST345     |    |
| YS65 | T | G | A | T | A | T | G | G | C | G | 6   |     | 29        | ST346     |    |
| YS66 | T | G | G | G | A | T | G | G | C | G | 4   | +   | 7         | ST32      | 4  |
| YS67 | T | G | A | G | A | T | G | G | C | G | N * | NA1 | 11        | ST321     |    |
| YS68 | T | G | A | T | A | T | G | G | C | G | 6   |     | untypable | ST426     |    |
| YS69 | T | A | A | G | A | T | G | G | C | G | 5   | NA1 | 12        | ST427     |    |
| YS70 | T | G | A | T | A | T | G | G | C | G | 6   |     | untypable | ST428     |    |
| YS71 | T | G | A | T | A | T | G | G | C | G | 6   |     | untypable | ST347     |    |
| YS72 | T | G | A | T | A | T | G | G | C | G | 6   |     | untypable | ST332     |    |

|      |   |   |   |   |   |   |   |   |   |   |     |           |           |    |
|------|---|---|---|---|---|---|---|---|---|---|-----|-----------|-----------|----|
| YS73 | T | G | A | G | A | T | G | G | C | A | 7-3 | untypable | ST348     | 12 |
| YS74 | T | G | A | T | A | T | G | G | C | G | 6   | untypable | ST333     |    |
| YS75 | T | G | A | T | A | T | G | G | C | G | 6   | untypable | ST349     |    |
| YS76 | T | G | A | T | A | T | G | G | C | G | 6   | 24        | ST350     |    |
| YS77 | T | G | A | T | A | T | G | G | C | G | 6   | 29        | ST334     |    |
| YS78 | T | G | A | G | A | T | G | G | C | A | 7-3 | 30        | ST351     |    |
| YS79 | T | G | A | T | A | T | G | G | C | G | 6   | 29        | ST334     |    |
| YS80 | T | G | A | T | A | T | G | G | C | G | 6   | untypable | ST429     |    |
| YS81 | T | G | A | T | A | T | G | G | C | G | 6   | untypable | ST398     | 13 |
| YS82 | T | G | A | T | A | T | G | G | C | G | 6   | untypable | ST430     | 13 |
| YS83 | T | G | A | T | A | T | G | G | C | G | 6   | untypable | ST430     | 13 |
| YS84 | T | G | A | T | A | T | G | G | C | G | 6   | untypable | ST398     | 13 |
| YS85 | T | G | A | T | A | T | G | G | C | G | 6   | untypable | ST399     | 8  |
| YS86 | T | G | A | G | A | T | G | G | C | A | 7-3 | untypable | ST400     |    |
| YS87 | T | G | A | T | A | T | G | G | C | G | 6   | untypable | ST431     | 8  |
| YS88 | T | G | A | G | A | T | G | G | C | G | N * | 5         | ST401     |    |
| YS89 | T | G | A | G | A | T | G | G | C | G | N * | 5         | ST401     |    |
| YS90 | T | G | A | T | A | T | G | G | C | G | 6   | 29        | ST450     |    |
| YS91 | T | G | A | T | A | T | G | G | C | G | 6   | untypable | ST451     | 15 |
| YS92 | T | G | A | T | A | T | G | G | C | G | 6   | untypable | ST452     | 15 |
| YS93 | T | G | A | T | A | T | G | G | C | G | 6   | untypable | ST452     | 15 |
| YS94 | T | G | A | T | A | T | G | G | C | G | 6   | untypable | ST402     |    |
| YS95 | T | G | A | T | A | T | G | G | C | G | 6   | untypable | untypable |    |
| YS96 | T | G | A | T | A | T | G | G | C | G | 6   | untypable | ST432     |    |
| YS97 | T | G | A | T | A | T | G | G | C | G | 6   | untypable | ST432     |    |
| YS98 | T | G | A | T | A | T | G | G | C | G | 6   | untypable | ST432     |    |

|       |   |   |   |   |   |   |   |   |   |   |   |           |           |
|-------|---|---|---|---|---|---|---|---|---|---|---|-----------|-----------|
| YS99  | T | G | A | T | A | T | G | G | C | G | 6 | untypable | ST432     |
| YS100 | T | G | A | T | A | T | G | G | C | G | 6 | untypable | ST432     |
| YS101 | T | G | A | T | A | T | G | G | C | G | 6 | untypable | ST433     |
| YS102 | T | G | A | T | A | T | G | G | C | G | 6 | untypable | ST433     |
| YS103 | T | G | A | T | A | T | G | G | C | G | 6 | untypable | ST403     |
| YS104 | T | G | A | T | A | T | G | G | C | G | 6 | untypable | ST434     |
| YS105 | T | G | A | T | A | T | G | G | C | G | 6 | 29        | ST435     |
| YS106 | T | G | A | T | A | T | G | G | C | G | 6 | 5         | ST406     |
| YS107 | T | G | A | T | A | T | G | G | C | G | 6 | untypable | ST436     |
| YS108 | T | G | A | T | A | T | G | G | C | G | 6 | untypable | untypable |
| YS109 | T | G | A | T | A | T | G | G | C | G | 6 | untypable | ST453     |
| YS110 | T | G | A | T | A | T | G | G | C | G | 6 | untypable | ST453     |
| YS111 | T | G | A | T | A | T | G | G | C | G | 6 | untypable | ST453     |
| YS112 | T | G | A | T | A | T | G | G | C | G | 6 | 29        | ST454     |
| YS113 | T | G | A | T | A | T | G | G | C | G | 6 | untypable | ST437     |
| YS114 | T | G | A | T | A | T | G | G | C | G | 6 | untypable | ST455     |
| YS115 | T | G | A | T | A | T | G | G | C | G | 6 | untypable | ST456     |
| YS116 | T | G | A | T | A | T | G | G | C | G | 6 | 24        | ST457     |
| YS117 | T | G | A | T | A | T | G | G | C | G | 6 | untypable | ST404     |
| YS118 | T | G | A | T | A | T | G | G | C | G | 6 | 29        | ST405     |
| YS119 | T | G | A | T | A | T | G | G | C | G | 6 | 5         | ST406     |
| YS120 | T | G | A | T | A | T | G | G | C | G | 6 | 30        | ST458     |
| YS121 | T | G | A | T | A | T | G | G | C | G | 6 | untypable | ST407     |
| YS122 | T | G | A | T | A | T | G | G | C | G | 6 | untypable | ST408     |
| YS123 | T | G | A | T | A | T | G | G | C | G | 6 | untypable | ST453     |
| YS124 | T | G | A | T | A | T | G | G | C | G | 6 | untypable | ST459     |

|       |   |   |   |   |   |   |   |   |   |   |     |           |           |    |
|-------|---|---|---|---|---|---|---|---|---|---|-----|-----------|-----------|----|
| YS125 | T | G | A | T | A | T | G | G | C | G | 6   | untypable | ST453     |    |
| YS126 | T | G | A | T | A | T | G | G | C | G | 6   | 29        | ST438     |    |
| YS127 | T | G | A | T | A | T | G | G | C | G | 6   | 29        | untypable |    |
| YS128 | T | G | A | T | A | T | G | G | C | G | 6   | untypable | ST439     |    |
| YS129 | T | G | A | T | A | T | G | G | C | G | 6   | untypable | ST439     |    |
| YS130 | T | G | A | T | A | T | G | G | C | G | 6   | untypable | ST460     |    |
| YS131 | T | G | A | T | A | T | G | G | C | G | 6   | untypable | ST453     |    |
| YS132 | T | G | A | T | A | T | G | G | C | G | 6   | untypable | untypable |    |
| YS133 | T | G | A | G | A | T | G | G | C | A | 7-3 | untypable | ST409     | 12 |
| YS134 | T | G | A | T | A | T | G | G | C | G | 6   | untypable | ST461     | 7  |
| YS135 | T | G | A | G | A | T | G | G | C | A | 7-3 | untypable | ST440     |    |
| YS136 | T | G | A | T | A | T | G | G | C | G | 6   | 12        | ST457     |    |
| YS137 | T | G | A | T | A | T | G | G | C | G | 6   | 24        | ST410     |    |
| YS138 | T | G | A | T | A | T | G | G | C | G | 6   | untypable | ST441     | 7  |
| YS139 | T | G | A | G | A | T | G | G | C | A | 7-3 | untypable | ST440     |    |
| YS140 | T | G | A | T | A | T | G | G | C | G | 6   | untypable | ST442     |    |
| YS141 | T | G | A | T | A | T | G | G | C | G | 6   | 24        | ST410     |    |
| YS142 | T | G | A | T | A | T | G | G | C | G | 6   | untypable | ST411     |    |
| YS143 | T | G | A | G | A | T | G | G | C | A | 7-3 | untypable | ST440     |    |
| YS144 | T | G | A | T | A | T | G | G | C | A | 6   | untypable | ST455     |    |
| YS145 | T | G | A | T | A | T | G | G | C | G | 6   | untypable | ST443     |    |
| YS146 | T | G | A | T | A | T | G | G | C | G | 6   | untypable | ST444     |    |
| YS147 | T | G | A | T | A | T | G | G | C | G | 6   | untypable | ST462     |    |
| YS148 | T | G | A | G | A | G | G | G | C | G | 7-2 | untypable | ST463     |    |
| YS149 | T | G | A | T | A | T | G | G | C | G | 6   | untypable | ST464     |    |
| YS150 | T | G | A | T | A | T | G | G | C | G | 6   | untypable | ST465     |    |

|       |   |   |   |   |   |   |   |   |   |   |     |           |           |    |       |
|-------|---|---|---|---|---|---|---|---|---|---|-----|-----------|-----------|----|-------|
| YS151 | T | G | A | T | A | T | G | G | C | G | 6   | untypable | ST466     |    |       |
| YS152 | T | G | A | T | A | T | G | G | C | G | 6   | 30        | ST414     |    |       |
| YS153 | T | G | A | T | A | T | G | G | C | G | 6   | 30        | ST445     |    |       |
| YS154 | T | G | A | T | A | T | G | G | C | G | 6   | 30        | ST412     |    |       |
| YS155 | T | G | A | T | A | T | G | G | C | G | 6   | untypable | ST446     |    |       |
| YS156 | T | G | A | T | A | T | G | G | C | G | 6   | untypable | ST447     | 11 |       |
| YS157 | T | G | A | T | A | T | G | G | C | G | 6   | 5         | ST413     |    |       |
| YS158 | T | G | A | T | A | T | G | G | C | G | 6   | 30        | ST445     |    |       |
| YS159 | T | G | A | T | A | T | G | G | C | G | 6   | untypable | ST448     |    |       |
| YS160 | T | G | A | T | A | T | G | G | C | G | 6   | untypable | ST467     |    |       |
| YS161 | T | G | A | T | A | T | G | G | C | G | 6   | 22        | untypable |    |       |
| YS162 | T | G | A | T | A | T | G | G | C | G | 6   | untypable | ST468     |    |       |
| YS163 | T | G | A | T | A | T | G | G | C | G | 6   | untypable | untypable |    |       |
| YS164 | T | G | A | T | A | T | G | G | C | G | 6   | 29        | ST414     |    |       |
| YS165 | T | G | A | T | A | T | G | G | C | G | 6   | untypable | ST415     | 11 |       |
| YS166 | T | G | A | T | A | T | G | G | C | G | 6   | untypable | ST469     |    |       |
| YS167 | T | G | A | T | A | T | G | G | C | G | 6   | untypable | ST470     |    |       |
| YS168 | T | G | A | T | A | T | G | G | C | G | 6   | untypable | ST470     |    |       |
| YS169 | T | G | A | T | A | T | G | G | C | G | 6   | 30        | ST471     | 14 |       |
| YS170 | T | G | A | T | A | T | G | G | C | G | 6   | untypable | ST469     |    |       |
| YS171 | T | G | A | T | A | T | G | G | C | G | 6   | untypable | ST472     |    |       |
| YS172 | T | G | A | T | A | T | G | G | C | G | 6   | 30        | ST473     | 14 |       |
| YS173 | T | G | A | T | A | T | G | G | C | G | 6   | untypable | untypable |    |       |
| YS174 | T | G | A | T | A | T | G | G | C | G | 6   | 5         | ST474     |    |       |
| YS175 | T | G | A | G | A | T | G | G | C | G | N * | 29        | ST416     |    |       |
| YS176 | T | G | A | G | A | T | G | G | C | G | N * | +         | NA1       | 15 | ST449 |

|       |   |   |   |   |   |   |   |   |   |   |   |   |   |    |           |           |     |   |
|-------|---|---|---|---|---|---|---|---|---|---|---|---|---|----|-----------|-----------|-----|---|
| YS177 | T | G | A | T | A | T | G | G | C | G | 6 |   |   |    | 5         | untypable |     |   |
| YS178 | T | G | A | T | A | T | G | G | C | G | 6 |   |   |    | untypable | untypable |     |   |
| YS179 | T | G | A | G | A | T | A | G | C | G | 1 | + | + | EU | -         | 2         | ST1 | 1 |

\* N: MCG ungroupable
