# Supplementary material
Source: PubMed Central journal article supplement (PMC4187759)
Supplement: JCM.00536-14_zjm999093730so3.pdf [file JCM.00536-14_zjm999093730so3.pdf]

Supplemental table 2: The genotypes of virulent markers.

|        | $mrp^{EU}epf^{+}sly^{+}$ | $mrp^{-}epf^{+}sly^{+}$ | $mrp^{NA2}epf^{+}sly^{+}$ | $mrp^{NA2}epf^{-}sly^{-}$ | $mrp^{-}epf^{-}sly^{+}$ | $mrp^{NA1}epf^{-}sly^{+}$ | $mrp^{NA1}epf^{-}sly^{-}$ | $mrp^{-}epf^{-}sly^{-}$ |
|--------|--------------------------|-------------------------|---------------------------|---------------------------|-------------------------|---------------------------|---------------------------|-------------------------|
| MCG1   | 4                        | 1                       | 1                         |                           |                         |                           |                           |                         |
| MCG2   |                          |                         |                           | 2                         |                         |                           |                           |                         |
| MCG3   |                          |                         |                           |                           |                         |                           |                           | 1                       |
| MCG4   |                          |                         |                           |                           | 2                       |                           | 7                         |                         |
| MCG5   |                          |                         |                           |                           |                         |                           | 9                         |                         |
| MCG6   |                          |                         |                           |                           |                         |                           |                           | 118                     |
| MCG7-1 |                          |                         |                           |                           |                         |                           | 2                         |                         |
| MCG7-2 |                          |                         |                           |                           |                         |                           |                           | 5                       |
| MCG7-3 |                          |                         |                           |                           |                         |                           |                           | 17                      |
| N*     |                          |                         |                           |                           |                         | 1                         | 3                         | 6                       |
| Total  | 4                        | 1                       | 1                         | 2                         | 2                       | 1                         | 21                        | 147                     |

\*: MCG ungroupable
